# Supplementary material
Source: Research Square preprint supplement (doi:10.21203/rs.3.rs-8976999/v1)
Supplement: Supplementary file 1 [file d3ad2dff46dead40b214b948.docx]

**Highlights**

- Forest type and species composition significantly regulate biomass production and carbon sequestration across Himalayan ecosystems.
- Wetland sediments store substantial soil carbon, underscoring their critical but under-recognized role in regional carbon budgets.
- Soil organic carbon, microbial biomass, and moisture collectively govern soil functionality and carbon stabilization.
- Soil Quality Index (SQI) varies markedly among land-use systems, reflecting differences in disturbance and management intensity.
- Integrated forest and land-use management enhances both soil health and ecosystem-level carbon sequestration.
